# Supplementary material for: SII as a potential biomarker for distinguishing between Necrotisingenterocolitis and Food protein-inducedenterocolitis syndrome with abdominal gas signs
Source: Research Square preprint supplement (doi:10.21203/rs.3.rs-7692398/v1), 2025-11-17
Supplement: Supplementary file 1 [file fcc6e3505a0e1d3bfa54ee10.docx]

Diagnostic criteria for highly suspected early onset food protein-induced enterocolitis syndrome (HSEO-FPIES).

Criteria：

Defining features

Major criteria ：

(1) Vomiting or bloody stools after ingestion of the suspected food and absence of fever (> 38 °C) with any cutaneousreaction (urticaria, hives, and/or angioedema)

(2) Modification of the infants’ diet (for formula feeding) or mother’s diet (for breast feeding) resulting in symptom resolution

(3) Antibiotics were used for less than three days and fasting was ceased within three days

Minor criteria：

(1) A second (or more) episode of repetitive symptoms after

eating a similar formula or mother eating suspected trigger food (for breast feeding)

(2) Repetitive symptoms after eating a different type of formula

(3) Extreme lethargy with any suspected reaction

(4) Marked pallor with any suspected reaction

(5) Need for emergency department visit with any suspected reaction

(6) Need for intravenous fluid support with any suspected reaction

(7) Diarrhoea within 24 h

(8) Hypotension

(9) Hypothermia
